# Supplementary material for: Universal Genotyping for Tuberculosis Prevention Programs: a 5-Year Comparison with On-Request Genotyping
Source: PubMed Central journal article supplement (PMC5925716; doi:10.1128/jcm.01778-17), 2018-04-25
Supplement: JCM.01778-17_zjm999095946s1.pdf [file JCM.01778-17_zjm999095946s1.pdf]

**SUPPLEMENTAL MATERIAL**

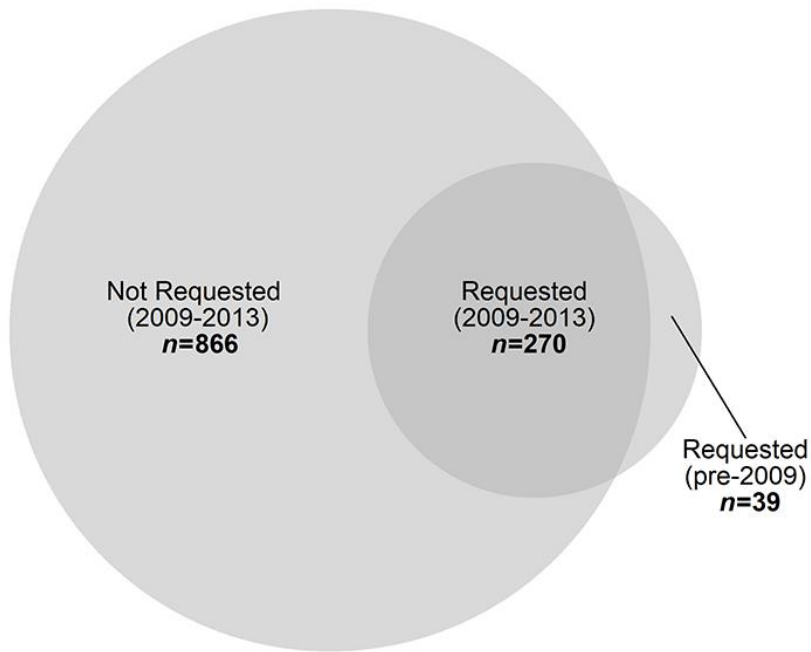

**FIG S1** Venn diagram representing the request status of the study sample ( $n=1,175$ ) for isolates with genotyping requested (all reasons) from 2009 through 2013, which included all genotyped isolates from specimens received at the British Columbia Centre for Disease Control Public Health Laboratory from 2009 through 2013, and those requested for genotyping with a specimen received date prior to 2009.

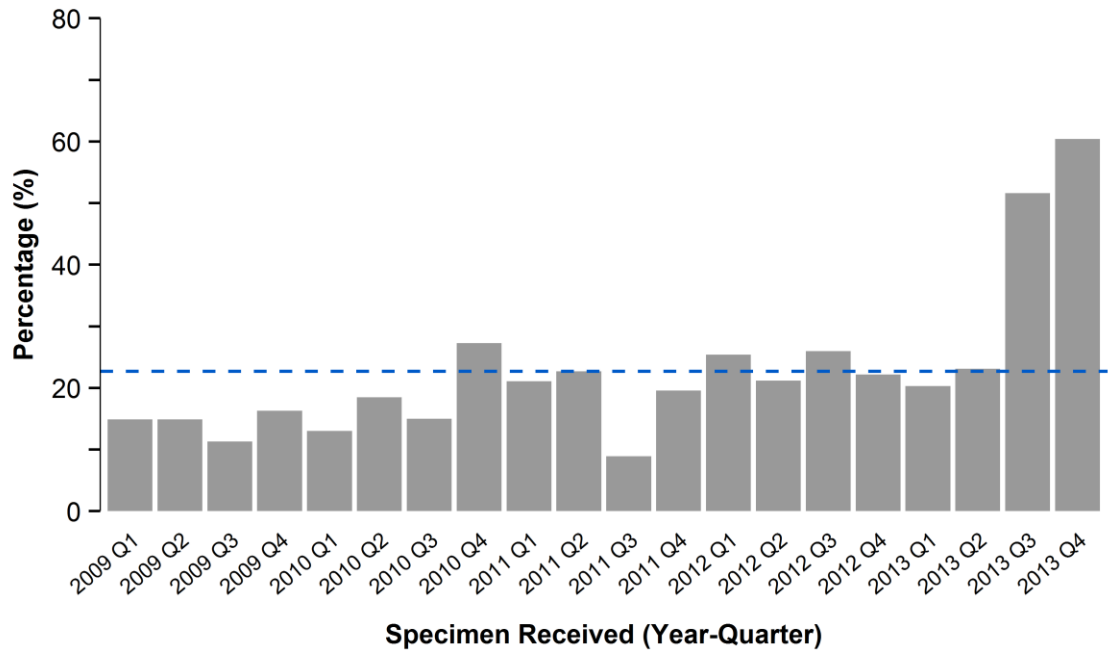

**FIG S2** Percentage of isolates requested for genotyping (all reasons) displayed by year and quarter specimens were received at the British Columbia Centre for Disease Control Public Health Laboratory from 2009 through 2013. Dashed line represents the mean percentage of genotyped isolates requested per quarter.

**TABLE S1** Logistic regression analysis for the relationship between MIRU-VNTR genotypic clustering and genotyping requested (2009–2013Q2) to confirm or refute transmission ( $n=813$ ), British Columbia.

| Characteristic                  | Clustered <sup>a</sup> vs. Unique |                         |
|---------------------------------|-----------------------------------|-------------------------|
|                                 | Unadjusted OR<br>(95% CI)         | Adjusted OR<br>(95% CI) |
| <b>Requested</b>                |                                   |                         |
| Yes                             | 8.5 (5.5–13.1)                    | 3.3 (2.0–5.4)           |
| No                              | Reference                         | Reference               |
| <b>Age, years</b>               |                                   |                         |
| 0-34                            | Reference                         | Reference               |
| 35-54                           | 1.8 (1.3–2.7)                     | 1.6 (1.0–2.5)           |
| 55–74                           | 1.0 (0.6–1.4)                     | 1.0 (0.6–1.6)           |
| 75+                             | 0.5 (0.3–0.8)                     | 0.8 (0.4–1.3)           |
| <b>Gender</b>                   |                                   |                         |
| Male                            | 1.2 (0.9–1.6)                     | 1.0 (0.7–1.4)           |
| Female                          | Reference                         | Reference               |
| <b>Birthplace</b>               |                                   |                         |
| Canada                          | 9.1 (6.3–13.0)                    | 4.9 (3.2–7.3)           |
| Outside Canada                  | Reference                         | Reference               |
| <b>Risk Factors<sup>b</sup></b> |                                   |                         |
| None                            | Reference                         | Reference               |
| ≥1                              | 6.8 (4.3–10.8)                    | 1.8 (1.0–3.1)           |

OR = odds ratio; CI = confidence interval.

<sup>a</sup>Cluster: ≥ 2 patients that share an identical genotype (24-locus MIRU-VNTR).

<sup>b</sup>Risk Factors = HIV positive, drug use, or alcohol misuse.

**TABLE S2** Relationship between genotype request status, risk factors<sup>a</sup> and genotypic clustering (Yes/No), British Columbia, 2009–2013.

| Characteristic         | No. Isolates (%) | Clustered (No.) |     |
|------------------------|------------------|-----------------|-----|
|                        |                  | Yes             | No  |
| <b>Requested</b>       |                  |                 |     |
| <i>No Risk Factors</i> | 131 (65.2)       | 73              | 58  |
| <i>≥1 Risk Factors</i> | 70 (34.8)        | 62              | 8   |
| <b>Not Requested</b>   |                  |                 |     |
| <i>No Risk Factors</i> | 657 (91.9)       | 185             | 472 |
| <i>≥1 Risk Factors</i> | 58 (8.1)         | 36              | 22  |

<sup>a</sup>*Risk Factors = HIV, drug use, or alcohol misuse; data unavailable for 1 or more risk factor (n=242).*

**TABLE S3** Characteristics of 24-locus MIRU–VNTR clusters comprised of  $\geq 5$  individuals, displayed as clusters that were predominantly Canadian- or foreign-born, British Columbia, 2009–2013.

| Cluster ID    | Cluster Size<br>(% Requested) | Predominant<br>Birthplace <sup>a</sup> (%) | Median Age<br>(IQR) years | Gender<br>M:F   | Predominant Community<br>Type (%) | Risk Factors <sup>b</sup><br>(%) | Median Deprivation <sup>c</sup><br>Quintile |
|---------------|-------------------------------|--------------------------------------------|---------------------------|-----------------|-----------------------------------|----------------------------------|---------------------------------------------|
| Canadian–born |                               |                                            |                           |                 |                                   |                                  |                                             |
| MClust-002    | 53 (86.8)                     | Canada (86.0)                              | 51 (44–58)                | 12.2            | Metro (71.7)                      | 39.6                             | 4.0                                         |
| MClust-012    | 28 (17.9)                     | Canada (89.3)                              | 46 (41–51)                | 1.8             | Metro (89.3)                      | 35.7                             | 4.0                                         |
| MClust-003    | 24 (62.5)                     | Canada (95.7)                              | 44 (28–52)                | 2.4             | Urban/Rural (41.7/41.7)           | 45.8                             | 4.0                                         |
| MClust-001    | 18 (55.6)                     | Canada (100.0)                             | 46 (37–52)                | 0.8             | Rural (50.0)                      | 44.4                             | 4.0                                         |
| MClust-008    | 14 (50.0)                     | Canada (85.7)                              | 51 (37–63)                | 1.3             | Metro (85.7)                      | 42.9                             | 3.0                                         |
| MClust-004    | 8 (62.5)                      | Canada (100.0)                             | 47 (40–57)                | 1.0             | Urban (75.0)                      | 37.5                             | 4.0                                         |
| MClust-005    | 7 (42.9)                      | Canada (85.7)                              | 57 (46–60)                | 2.5             | Metro (85.7)                      | 14.3                             | 2.0                                         |
| MClust-006    | 5 (100.0)                     | Canada (100.0)                             | 25 (23–37)                | 0.7             | Rural (80.0)                      | 0.0                              | 3.0                                         |
| MClust-052    | 5 (60.0)                      | Canada (100.0)                             | 53 (43–61)                | NA <sup>d</sup> | Metro/Urban (40.0/40.0)           | 100.0                            | 5.0                                         |
| MClust-055    | 5 (100.0)                     | Canada (100.0)                             | 42 (34–48)                | 0.7             | Urban (80.0)                      | 20.0                             | 3.0                                         |
| Foreign-born  |                               |                                            |                           |                 |                                   |                                  |                                             |
| MClust-011    | 19 (21.1)                     | Philippines (94.4)                         | 42 (33–53)                | 2.8             | Metro (68.4)                      | 0.0                              | 4.0                                         |
| MClust-021    | 12 (16.7)                     | Philippines (100.0)                        | 44 (29–51)                | 0.7             | Metro (83.3)                      | 0.0                              | 3.5                                         |
| MClust-187    | 10 (30.0)                     | <i>Mixed</i> <sup>e</sup> (88.8)           | 80 (55–88)                | 0.7             | Metro (100.0)                     | 0.0                              | 3.0                                         |
| MClust-046    | 9 (22.2)                      | India (77.8)                               | 70 (56–75)                | 1.2             | Metro (88.9)                      | 0.0                              | 2.0                                         |
| MClust-038    | 8 (12.5)                      | China/Hong Kong (100.0)                    | 79 (72–81)                | 3.0             | Metro (100.0)                     | 0.0                              | 3.5                                         |
| MClust-033    | 7 (14.3)                      | <i>Mixed</i> <sup>e</sup> (85.8)           | 68 (42–76)                | 0.8             | Metro (100.0)                     | 0.0                              | 3.0                                         |
| MClust-149    | 6 (0.0)                       | India (83.3)                               | 50 (34–76)                | 0.5             | Metro/Urban (50.0/50.0)           | 0.0                              | 2.5                                         |
| MClust-170    | 6 (33.3)                      | China (83.3)                               | 68 (55–75)                | 1.0             | Metro (100.0)                     | 0.0                              | 3.0                                         |
| MClust-016    | 5 (40.0)                      | Philippines (100.0)                        | 39 (32–41)                | 0.7             | Metro/Urban (40.0/40.0)           | 0.0                              | 3.0                                         |
| MClust-040    | 5 (20.0)                      | <i>Mixed</i> <sup>e</sup> (80.0)           | 75 (35–86)                | 0.7             | Metro (100.0)                     | 0.0                              | 3.0                                         |

*IQR: interquartile range.*

<sup>a</sup>Information for birthplace was unknown for 6 patients; percentage represents those with complete data.

<sup>b</sup>One or more risk factors for transmission (HIV, drug use, or alcohol misuse); data unavailable (n=50); percentage represents those with complete data.

<sup>c</sup>Canadian Marginalization Index (20), material deprivation (quintile 1: least deprived, quintile 5: most deprived); data unavailable (n=23).

<sup>d</sup>All individuals were male.

<sup>e</sup>Various Asian countries.
